# Supplementary material
Source: ML conference proceedings conference paper supplement (https://proceedings.mlr.press/v119/paty20a.html)
Supplement: Supplementary file [file paty20a-supp.pdf]

## A. Proofs

### A.1. Proof for Proposition 1

*Proof.* Let  $\pi_*$  be a minimizer of (3). Then using the optimality condition for  $\sup_{c \in \mathcal{C}(\mathcal{X}^2)} \int c d\pi - F^*(c)$ , any  $c$  such that  $\pi_* \in \partial F^*(c)$  is a best response to  $\pi_*$ . But by Fenchel-Young inequality, such  $c$  are exactly those in  $\partial F(\pi_*) = \{\nabla F(\pi_*)\}$ . Since  $\nabla F(\pi_*)$  is the unique best response to  $\pi_*$ , it is necessarily optimal in (4). Conversely, if there is a unique maximizer  $c_*$ , then as a result of the above,  $c_* = \nabla F(\pi_*)$  for some minimizer  $\pi_*$  of the primal. Then  $\nabla F^*(c_*)$  is optimal in the primal.  $\square$

### A.2. Proof for Remark 2

*Proof.* As in the proof of Theorem 1:

$$\begin{aligned} \inf_{\pi \in \Pi(\mu, \nu)} F(\pi) &= \inf_{\pi \in \Pi(\mu, \nu)} -(-F)^{**}(\pi) \\ &= \inf_{\pi \in \Pi(\mu, \nu)} - \sup_{c \in \mathcal{C}(\mathcal{X}^2)} \int c d\pi - (-F)^*(c) \\ &= \inf_{\pi \in \Pi(\mu, \nu)} \inf_{c \in \mathcal{C}(\mathcal{X}^2)} \int -c d\pi + (-F)^*(c) \\ &= \inf_{\pi \in \Pi(\mu, \nu)} \inf_{c \in \mathcal{C}(\mathcal{X}^2)} \int c d\pi + (-F)^*(-c) \\ &= \inf_{c \in \mathcal{C}(\mathcal{X}^2)} \mathcal{F}_c(\mu, \nu) + (-F)^*(-c). \end{aligned}$$

$\square$

### A.3. Proof for Proposition 2

*Proof.* As in the proof of Theorem 1, we use Sion's minimax theorem to get

$$\begin{aligned} \sup_{\mathbf{c} \in \mathbb{R}_+^{n \times n}} \min_{\pi \in \Pi(\mu, \nu)} \langle \mathbf{c}, \pi \rangle - \varepsilon \sum_{ij} R_{ij}^* \left( \frac{\mathbf{c}_{ij} - \mathbf{c}_{0ij}}{\varepsilon} \right) \\ = \min_{\pi \in \Pi(\mu, \nu)} \sup_{\mathbf{c} \in \mathbb{R}_+^{n \times n}} \langle \mathbf{c}, \pi \rangle - \varepsilon \sum_{ij} R_{ij}^* \left( \frac{\mathbf{c}_{ij} - \mathbf{c}_{0ij}}{\varepsilon} \right). \end{aligned}$$

Since the optimization in  $\mathbf{c} \in \mathbb{R}_+^{n \times n}$  is separable, we only need to consider this optimization coordinate by coordinate, *i.e.* we only need to compute  $\sup_{\mathbf{c}_{ij} \in \mathbb{R}_+} \pi_{ij} \mathbf{c}_{ij} - f_{ij}^*(\mathbf{c}_{ij})$  for all  $i, j \in \llbracket n \rrbracket$ , where  $f_{ij}^*(\mathbf{c}_{ij}) = \varepsilon R_{ij}^* \left( \frac{\mathbf{c}_{ij} - \mathbf{c}_{0ij}}{\varepsilon} \right)$ .

Fix  $\pi \in \Pi(\mu, \nu)$  and  $i, j \in \llbracket n \rrbracket$ , and define  $g_{ij} : \mathbb{R} \ni \mathbf{c}_{ij} \mapsto \pi_{ij} \mathbf{c}_{ij} - f_{ij}^*(\mathbf{c}_{ij})$ .

Suppose that  $z_{ij} = f'_{ij}(\pi_{ij}) \geq 0$ . Then

$$f_{ij}(\pi_{ij}) = f_{ij}^{**}(\pi_{ij}) = g_{ij}(z_{ij}) = \sup_{\mathbf{c}_{ij} \in \mathbb{R}} g_{ij}(\mathbf{c}_{ij}),$$

and since  $z_{ij} \geq 0$ ,  $\sup_{\mathbf{c}_{ij} \in \mathbb{R}_+} g_{ij}(\mathbf{c}_{ij}) = f_{ij}(\pi_{ij})$ . This means that  $\widehat{R}_{ij}(\pi_{ij}) = R_{ij}(\pi_{ij})$ .  $\square$

Suppose now that  $z_{ij} = f'_{ij}(\pi_{ij}) < 0$ . This means that

$$\sup_{\mathbf{c}_{ij} \in \mathbb{R}_+} g_{ij}(\mathbf{c}_{ij}) < \sup_{\mathbf{c}_{ij} \in \mathbb{R}} g_{ij}(\mathbf{c}_{ij}).$$

Since  $g_{ij}$  is concave, this shows that  $\sup_{\mathbf{c}_{ij} \in \mathbb{R}_+} g_{ij}(\mathbf{c}_{ij}) = g_{ij}(0) = -f_{ij}^*(0)$ , *i.e.*  $\widehat{R}_{ij}(\pi_{ij}) = \frac{-\mathbf{c}_{0ij}}{\varepsilon} \pi_{ij} - R_{ij}^* \left( \frac{-\mathbf{c}_{0ij}}{\varepsilon} \right)$ .

Since  $R_{ij}$  is convex,  $R'_{ij}$  is increasing with pseudo-inverse  $R_{ij}^{* \prime}$ . Furthermore, the optimality condition in the convex conjugate problem gives, for any  $\alpha \in \mathbb{R}$ :

$$R_{ij}^*(\alpha) = \alpha \times R_{ij}^{* \prime}(\alpha) - R_{ij} \circ R_{ij}^{* \prime}(\alpha).$$

So if  $R_{ij}$  is of class  $C^1$ , taking  $\alpha = \frac{-\mathbf{c}_{0ij}}{\varepsilon}$ , as  $x$  increases to  $R_{ij}^{* \prime} \left( -\frac{\mathbf{c}_{0ij}}{\varepsilon} \right)$ :

$$\widehat{R}_{ij}(x) \longrightarrow R_{ij} \circ R_{ij}^{* \prime} \left( -\frac{\mathbf{c}_{0ij}}{\varepsilon} \right) = \widehat{R}_{ij} \circ R_{ij}^{* \prime} \left( -\frac{\mathbf{c}_{0ij}}{\varepsilon} \right),$$

meaning that  $\widehat{R}_{ij}$  is of class  $C^1$ .  $\square$

### A.4. Proof for Example 3

*Proof.* We denote by  $\text{sgn}(x)$  the set  $\{+1\}$  if  $x > 0$ ,  $\{-1\}$  if  $x < 0$  and  $[-1, 1]$  if  $x = 0$ . We apply Corollary 1 with  $R : \mathbb{R}^{n \times n} \rightarrow \mathbb{R}$  defined as  $R(\pi) = \frac{1}{p} \|\pi\|_{\mathbf{w}, p}^p$ , for which we need to compute its convex conjugate:

$$R^*(\mathbf{c}) = \sup_{\pi \in \mathbb{R}^{n \times n}} \langle \pi, \mathbf{c} \rangle - \frac{1}{p} \sum_{ij} \mathbf{w}_{ij} |\pi_{ij}|^p.$$

Subdifferentiating with respect to  $\pi_{ij}$ :

$$\begin{aligned} \mathbf{c}_{ij} &\in \frac{1}{p} \mathbf{w}_{ij} \frac{\partial}{\partial \pi_{ij}} |\pi_{ij}|^p \\ &= \mathbf{w}_{ij} \text{sgn}(\pi_{ij}) |\pi_{ij}|^{p-1} \end{aligned}$$

This implies that  $\text{sgn}(\pi_{ij}) = \text{sgn}(\mathbf{c}_{ij})$ , so:

$$\pi_{ij} = \text{sgn}(\mathbf{c}_{ij}) \left| \frac{\mathbf{c}_{ij}}{\mathbf{w}_{ij}} \right|^{q-1}.$$

Finally,

$$\begin{aligned} R^*(\mathbf{c}) &= \sum_{ij} \mathbf{c}_{ij} \text{sgn}(\mathbf{c}_{ij}) \left| \frac{\mathbf{c}_{ij}}{\mathbf{w}_{ij}} \right|^{q-1} - \frac{1}{p} \sum_{ij} \mathbf{w}_{ij} \left| \frac{\mathbf{c}_{ij}}{\mathbf{w}_{ij}} \right|^q \\ &= \frac{1}{q} \sum_{ij} \frac{1}{\mathbf{w}_{ij}^{q-1}} |\mathbf{c}_{ij}|^q \\ &= \frac{1}{q} \|\mathbf{c}\|_{1/\mathbf{w}^{q-1}, q}^q. \end{aligned}$$

$\square$

### A.5. Proof for Example 6

*Proof.* Since  $\boldsymbol{\pi} \in \Pi(\boldsymbol{\mu}, \boldsymbol{\nu})$ ,  $\sum_{ij} \pi_{ij} = 1$  so we can drop it for now and only consider the term  $R(\boldsymbol{\pi}) = \frac{1}{q-1} \|\boldsymbol{\pi}\|_q^q$  which is separable in the coordinates of  $\boldsymbol{\pi}$ :

$$R(\boldsymbol{\pi}) = \sum_{ij} f(\pi_{ij})$$

where we have defined the convex function

$$f(x) = \begin{cases} \frac{1}{q-1} x^q & \text{if } x \geq 0 \\ +\infty & \text{otherwise.} \end{cases}$$

We compute its convex conjugate:

$$\begin{aligned} f^*(y) &= \sup_{x \geq 0} \left\{ xy - \frac{1}{q-1} x^q \right\} \\ &= \begin{cases} \left(\frac{y}{p}\right)^p & \text{if } y \leq 0 \\ +\infty & \text{if } y > 0 \end{cases} \end{aligned}$$

where  $p = \frac{q}{q-1} \leq 0$  is such that  $1/p + 1/q = 1$ . Then  $R^*(\mathbf{c}) = +\infty$  if  $\mathbf{c}$  has a positive entry, and over  $\mathbb{R}_-^{n \times n}$ :

$$\begin{aligned} R^*(\mathbf{c}) &= \sum_{ij} f^*(\mathbf{c}_{ij}) = \sum_{ij} \left(\frac{\mathbf{c}_{ij}}{p}\right)^p \\ &= \sum_{ij} \left(\frac{-\mathbf{c}_{ij}}{-p}\right)^p \\ &= (-p)^{-p} \sum_{ij} \left(\frac{1}{-\mathbf{c}_{ij}}\right)^{-p}. \end{aligned}$$

Adding the term  $\frac{\varepsilon}{1-q}$  we left aside to the result of Corollary 1, we find that Tsallis regularized OT is equal to:

$$\begin{aligned} &\sup_{\mathbf{c} \in \mathbb{R}^{n \times n}} \mathcal{I}_{\mathbf{c}}(\boldsymbol{\mu}, \boldsymbol{\nu}) - \varepsilon R^* \left(\frac{\mathbf{c} - \mathbf{c}_0}{\varepsilon}\right) + \frac{\varepsilon}{1-q} \\ &= \sup_{\substack{\mathbf{c} \in \mathbb{R}^{n \times n} \\ \mathbf{c} \leq \mathbf{c}_0}} \mathcal{I}_{\mathbf{c}}(\boldsymbol{\mu}, \boldsymbol{\nu}) - \varepsilon (-p)^{-p} \sum_{ij} \left[\frac{\varepsilon}{\mathbf{c}_{0ij} - \mathbf{c}_{ij}}\right]^{-p} \\ &\quad + \frac{\varepsilon}{1-q} \\ &= \sup_{\substack{\mathbf{c} \in \mathbb{R}^{n \times n} \\ \mathbf{c} \leq \mathbf{c}_0}} \mathcal{I}_{\mathbf{c}}(\boldsymbol{\mu}, \boldsymbol{\nu}) - \varepsilon^{\frac{1}{1-q}} (-p)^{-p} \sum_{ij} \left[\frac{1}{\mathbf{c}_{0ij} - \mathbf{c}_{ij}}\right]^{-p} \\ &\quad + \frac{\varepsilon}{1-q} \\ &= \sup_{\substack{\mathbf{c} \in \mathbb{R}^{n \times n} \\ \mathbf{c} \leq \mathbf{c}_0}} \mathcal{I}_{\mathbf{c}}(\boldsymbol{\mu}, \boldsymbol{\nu}) - \varepsilon^{\frac{1}{1-q}} (-p)^{-p} \left\| \frac{1}{\mathbf{c}_0 - \mathbf{c}} \right\|_{-p}^{-p} \\ &\quad + \frac{\varepsilon}{1-q}. \end{aligned}$$

### A.6. Proof for Subsection 7.2

**Entropic OT** In the case of entropic OT,

$$F(\boldsymbol{\pi}) = \langle \boldsymbol{\pi}, \mathbf{c}_0 \rangle + \varepsilon \sum_{ij} \pi_{ij} [\log \pi_{ij} - 1],$$

so

$$F^*(\mathbf{c}) = \varepsilon \sum_{ij} \exp\left(\frac{\mathbf{c}_{ij} - \mathbf{c}_{0ij}}{\varepsilon}\right)$$

and

$$\nabla F^*(\mathbf{c}) = \left[ \exp\left(\frac{\mathbf{c}_{ij} - \mathbf{c}_{0ij}}{\varepsilon}\right) \right]_{ij}.$$

Then the system of equations (13) (14) is:

$$\begin{aligned} \forall i, \boldsymbol{\mu}_i &= \sum_j \exp\left(\frac{\phi_{*i} + \psi_{*j} - \mathbf{c}_{0ij}}{\varepsilon}\right) \\ &= \exp(\phi_{*i}/\varepsilon) [K \exp(\boldsymbol{\psi}_*/\varepsilon)]_i \\ \forall j, \boldsymbol{\nu}_j &= \sum_i \exp\left(\frac{\phi_{*i} + \psi_{*j} - \mathbf{c}_{0ij}}{\varepsilon}\right) \\ &= \exp(\boldsymbol{\psi}_{*j}/\varepsilon) [K^\top \exp(\boldsymbol{\phi}_*/\varepsilon)]_j \end{aligned}$$

where  $K = \exp(-\mathbf{c}_0/\varepsilon) \in \mathbb{R}^{n \times n}$  and  $\exp$  is taken element-wise. Then solving alternatively for  $\boldsymbol{\phi}$  and  $\boldsymbol{\psi}$  is exactly Sinkhorn algorithm.

**Quadratic OT** In the case of quadratic OT, using the notations and results from example 8:

$$F(\boldsymbol{\pi}) = \langle \boldsymbol{\pi}, \mathbf{c}_0 \rangle + \varepsilon \varphi_2(\boldsymbol{\pi}_{ij}),$$

and

$$F^*(\mathbf{c}) = \frac{1}{2\varepsilon} \sum_{ij} \left[ (\mathbf{c}_{ij} - \mathbf{c}_{0ij})_+ \right]^2.$$

Then:

$$\nabla F^*(\mathbf{c}) = \frac{1}{\varepsilon} (\mathbf{c} - \mathbf{c}_0)_+.$$

The system of equations (13) (14) is:

$$\begin{aligned} \forall i, \varepsilon \boldsymbol{\mu}_i &= \sum_j \left( \phi_{*i} + \psi_{*j} - \mathbf{c}_{0ij} \right)_+ \\ \forall j, \varepsilon \boldsymbol{\nu}_j &= \sum_i \left( \phi_{*i} + \psi_{*j} - \mathbf{c}_{0ij} \right)_+ \end{aligned}$$

which is what (Blondel et al., 2018) solve in their appendix B.

□
